# Supplementary material
Source: ML conference proceedings conference paper supplement (https://proceedings.mlr.press/v139/biedenkapp21a.html)
Supplement: Supplementary file [file biedenkapp21a-supp.pdf]

## A. Detailed Baseline Description

**Dynamic Action Repetition** (DAR; Lakshminarayanan et al., 2017) is a framework for discrete-action space deep RL algorithms. For a discrete-action space  $\mathcal{A} = \{a_1, \dots, a_{|\mathcal{A}|}\}$  DAR duplicates this space such that an agent can choose from  $2 \times |\mathcal{A}|$  actions. Further, DAR introduces two hyperparameters  $r_1$  and  $r_2$ , each of which are associated with one half of the new action space. These hyperparameters determine the number of time-steps an action will be played for, with both actions  $a_k$  and  $a_{2k}$  ( $1 \leq k \leq |\mathcal{A}|$ ) performing the same behaviour but  $a_k$  is repeated for  $r_1$  time-steps and  $a_{2k}$  for  $r_2$  time-steps. When training an agent, there are no modifications to the training procedure, other than an agent now having to select from a larger action space. Figure A1 schematically depicts a DAR DQN agents  $Q$ -network architecture.

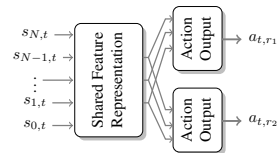

Figure A1. Schematic DAR Architecture with duplicate output heads to learn at two time-scales  $r_1$  and  $r_2$ .

This gives an agent two levels of control to decide on how long to apply an action. A drawback of this framework is that the output heads are independent from each other and are not aware that certain action outputs have the same influence on the environment for  $\min(r_1, r_2)$  time-steps. Further, both  $r_1$  and  $r_2$  have to be defined beforehand, requiring good prior knowledge about the potential levels of fine and coarse control in an environment.

**Fine Grained Action Repetition** (FiGAR; Sharma et al., 2017) is a framework for both discrete and continuous action spaces. Instead of learning a single policy that has to learn both which action to play and how long to follow it (as in DAR), FiGAR decouples the behaviour and repetition learning by using two separate policies  $\pi_a: \mathcal{S} \rightarrow \mathcal{A}$  and  $\pi_r: \mathcal{S} \rightarrow \{1, 2, \dots, \text{max repetition}\}$ . When training an agent, based on a state  $s$ ,  $\pi_a$  decides which action to play and simultaneously  $\pi_r$  decides how long to repeat a selected action starting from  $s$ . At the time of selecting their respective actions, neither  $\pi_a$  nor  $\pi_r$  are aware of the other policies decision. Thus, the action and the respective repetition value are selected independently from each other.

To couple the learning of both policies Sharma et al. (2017) use a joint loss to update the network weights and further suggest to use weight-sharing of the input-layers of the two policy networks. Although this aligns the policies when performing a training step, at decision time the policies remain uninformed about each others behaviour. Counter to DAR, FiGAR allows for much more fine-grained control over the action repetition. However, FiGAR requires more modification of a base algorithm to allow for learning of control at different time-steps. With TempoRL we propose a method that allows for the same fine-grained level of control while requiring no modifications to the base agent architecture.

**Algorithm 1** TEMPORL  $Q$ -learning

---

```

1: Input: environment  $env$  with states  $\mathcal{S}$  and actions  $\mathcal{A}$ , skip-Actions  $\mathcal{J}$ ,
   behaviour and skip  $Q$ -functions  $Q(\cdot, \cdot)$ ,  $Q(\cdot, \cdot|\cdot)$ , training episodes  $E$ 
2: Initialize  $Q(s, a)$ ,  $Q(s, j|a) \forall s \in \mathcal{S}, a \in \mathcal{A}, j \in \mathcal{J}$ 
3: for episode  $\in \{1, \dots, E\}$  do
4:    $s \leftarrow env.reset()$ 
5:   repeat
6:      $a \leftarrow \pi(s)$  # e.g.  $\epsilon$ -greedy arg  $\max_{a' \in \mathcal{A}} Q(s, a')$ 
7:      $j \leftarrow \pi_j(s, a)$  # e.g.  $\epsilon$ -greedy arg  $\max_{j' \in \mathcal{J}} Q(s, j'|a)$ 
8:     trajectory  $\leftarrow [s]$  # Tracks the skip trajectory
9:     repeat
10:       $r, s' \leftarrow env.step(a)$ 
11:      append  $s'$  to trajectory # Records the state transitions
12:       $Q(s, a) \leftarrow td\_update(Q(s, a), r, s')$  # See Equation 5
13:       $s \leftarrow s'$ 
14:    until all skips  $1, \dots, j$  performed or episode ends
15:     $\mathcal{G} \leftarrow build\_connectedness\_graph(trajectory)$  # Build a local connectedness graph from
   the observed trajectory
16:    for all connections  $c \in \mathcal{G}$  do
17:      get  $s_{start}, s_{end}, j', r'$  from  $c$ 
18:       $Q(s_{start}, j'|a) \leftarrow td\_update\_skip(Q(s_{start}, j'|a), r', s_{end})$  # See Equation 6
19:    end for
20:  until episode finished
21: end for

```

---

## B. Implementation Details

Algorithm 1 details how to train a TEMPORL  $Q$ -learning agent. All elements that are new to TEMPORL are shown in black whereas vanilla  $Q$ -learning code is greyed out. The functions  $td\_update$  (Line 12) and  $td\_update\_skip$  (Line 18) are formally stated in Equations 5 and 6 respectively and give the temporal difference updates required during learning.

$$Q(s_t, a_t) = Q(s_t, a_t) + \alpha \underbrace{\left( \underbrace{r_t + \gamma \max Q(s_{t+1}, \cdot)}_{\text{TD-Target}} \right)}_{\text{TD-Delta}} - Q(s_t, a_t) \quad (5)$$

$$Q(s_t, j_t|a_t) = Q(s_t, j_t|a_t) + \alpha \underbrace{\left( \underbrace{\sum_{k=0}^{j-1} \gamma^k r_{t+k} + \gamma^j \max Q(s_{t+j}, \cdot)}_{\text{TD-Target}} \right)}_{\text{TD-Delta}} - Q(s_t, j_t|a_t) \quad (6)$$

Where  $\alpha$  is the learning rate and  $\gamma$  the discount factor. Note that the TD-Target in Equation 6 (as well as the skip  $Q$ -function in Equation 4) is using the behaviour  $Q$ -function and not the skip  $Q$ -function. Thus, the skip  $Q$ -function estimates the expected future rewards, assuming that the current skip will be the only skip in the MDP. This allows us to avoid overestimating  $Q$ -values through multiple skips and focuses on learning of the value of the executed skip similar to double  $Q$ -learning (van Hasselt, 2010). Further, learning of the skip-values does not interfere with learning of the behaviour  $Q$ -function.

The function  $build\_connectedness\_graph$  (Line 15) builds takes an observed trajectory and builds connectedness graph of states that are reachable by repeatedly playing the same action (see Figure 1 in the main paper). Each connection contains information about start and end states, the length of the skip and the discounted reward for that skip.



Table E1. Normalized AUC for reward and average number of decision steps for varying maximal skip-lengths  $J$ . All agents are trained with the same  $\epsilon$  schedule.  $\mathcal{R}$  denotes normalized area under the reward curve and  $D$  the average number of decision steps. Values are results of running 10 random seeds. Columns 1 and 7 are equivalent to columns 5 & 6 in Table 1.

| (a) linear decaying $\epsilon$ -schedule |      |      |      |      |      |      |           |      |      |      |      |      |      |      |      |      |
|------------------------------------------|------|------|------|------|------|------|-----------|------|------|------|------|------|------|------|------|------|
| $J$                                      | $Q$  |      |      |      |      |      | $t$ - $Q$ |      |      |      |      |      |      |      |      |      |
|                                          | 1    | 2    | 3    | 4    | 5    | 6    | 7         | 8    | 9    | 10   | 11   | 12   | 13   | 14   | 15   | 16   |
| $\mathcal{R}$                            | 0.57 | 0.63 | 0.76 | 0.87 | 0.93 | 0.93 | 0.92      | 0.91 | 0.90 | 0.91 | 0.88 | 0.87 | 0.86 | 0.87 | 0.85 | 0.84 |
| $D$                                      | 83.6 | 36.5 | 20.6 | 13.2 | 10.1 | 8.3  | 7.7       | 7.8  | 7.5  | 7.4  | 7.6  | 7.4  | 7.6  | 7.6  | 7.8  | 7.4  |

  

| (b) logarithmic decaying $\epsilon$ -schedule |      |      |      |      |      |      |      |      |      |      |      |      |      |      |      |      |
|-----------------------------------------------|------|------|------|------|------|------|------|------|------|------|------|------|------|------|------|------|
| $\mathcal{R}$                                 | 0.90 | 0.91 | 0.93 | 0.96 | 0.96 | 0.96 | 0.96 | 0.96 | 0.96 | 0.96 | 0.96 | 0.96 | 0.95 | 0.96 | 0.95 | 0.95 |
| $D$                                           | 35.6 | 21.7 | 14.9 | 11.6 | 9.5  | 8.6  | 6.4  | 6.3  | 6.5  | 5.9  | 6.1  | 6.2  | 7.0  | 6.8  | 7.0  | 6.0  |

  

| (c) constant $\epsilon = 0.1$ |      |      |      |      |      |      |      |      |      |      |      |      |      |      |      |      |
|-------------------------------|------|------|------|------|------|------|------|------|------|------|------|------|------|------|------|------|
| $\mathcal{R}$                 | 0.95 | 0.98 | 0.98 | 0.99 | 0.99 | 0.99 | 0.99 | 0.99 | 0.99 | 0.99 | 0.99 | 0.99 | 0.99 | 0.99 | 0.99 | 0.98 |
| $D$                           | 27.6 | 15.8 | 12.0 | 9.1  | 8.2  | 7.8  | 6.8  | 6.9  | 6.7  | 7.1  | 6.6  | 7.2  | 6.2  | 6.5  | 7.0  | 6.9  |

## E. Influence of the Maximum Skip-Length

The maximum skip length  $J$  is a crucial hyperparameter of TEMPORL. A too large value might lead to many irrelevant choices which the agent has to learn to ignore; whereas a too small value might not reduce the complexity of the environment sufficiently enough, leading to barely an improvement over the vanilla counterpart. To evaluate the influence of the hyperparameter on our method we trained various TEMPORL agents with varying maximal skip-lengths, starting from 2 up to 16. Larger skips than 10 will never be beneficial for the agent as the agent is guaranteed to run into a wall for some steps. Depending on where in the environment the agent is located, smaller skip-values might allow it to quickly traverse through the environment.

Table E1 shows the influence of  $J$  on the ZigZag environment (see Figure 4c). In this environment, the largest skip value that is possible without running into a wall is 6. Thus, small skip values up to 5 quickly improve the performance over the vanilla counterpart, not only in terms of anytime performance but also in terms of required decisions. In the case of a suboptimal exploration policy, in the form of linearly decaying  $\epsilon$ -greedy schedule (see Table E1a), larger skip-values quickly lead to a decrease in anytime performance, as the agent has to learn to never choose many non-improving skip actions.

For a more suiting exploration policy, too large skip-actions do not as quickly degrade the anytime performance of our TEMPORL agents. In the case of a logarithmically decaying  $\epsilon$  schedule (Table E1b), we can see that skip sizes larger or equal than 12 start to negatively influence the anytime performance, whereas with a constant  $\epsilon$  schedule only a skip-size of 16, nearly 3 times as large as the largest sensible choice, has a negative effect.

Similar observations can be made for deep TEMPORL on both Pedulum, MountainCar and LunarLander, see Tables 2 - 4 in the main paper. We can see that choosing larger maximal skip-values is beneficial, up to a point, at which many irrelevant, and potentially useless choices are in the action space. For these, TEMPORL first has to learn on which part of the skip-action-space to focus before really learning when new decisions need to be taken.

It is worth noting that, in the tabular case, all evaluated skip-sizes  $J$  result in better anytime-performance and a lower number of required decision points compared to vanilla  $Q$ -learning, for all considered exploration strategies. In future work, we will study how to allow TEMPORL to select large skip-actions without needing to learn to distinguish between many irrelevant choices. One possible way of doing this could be by putting the skip-size on a log scale. For example using  $\log_2$  could result in only 10 actions where a TEMPORL agent could skip up to 1024 steps ahead but would still be able to exert fine control with the smaller actions.

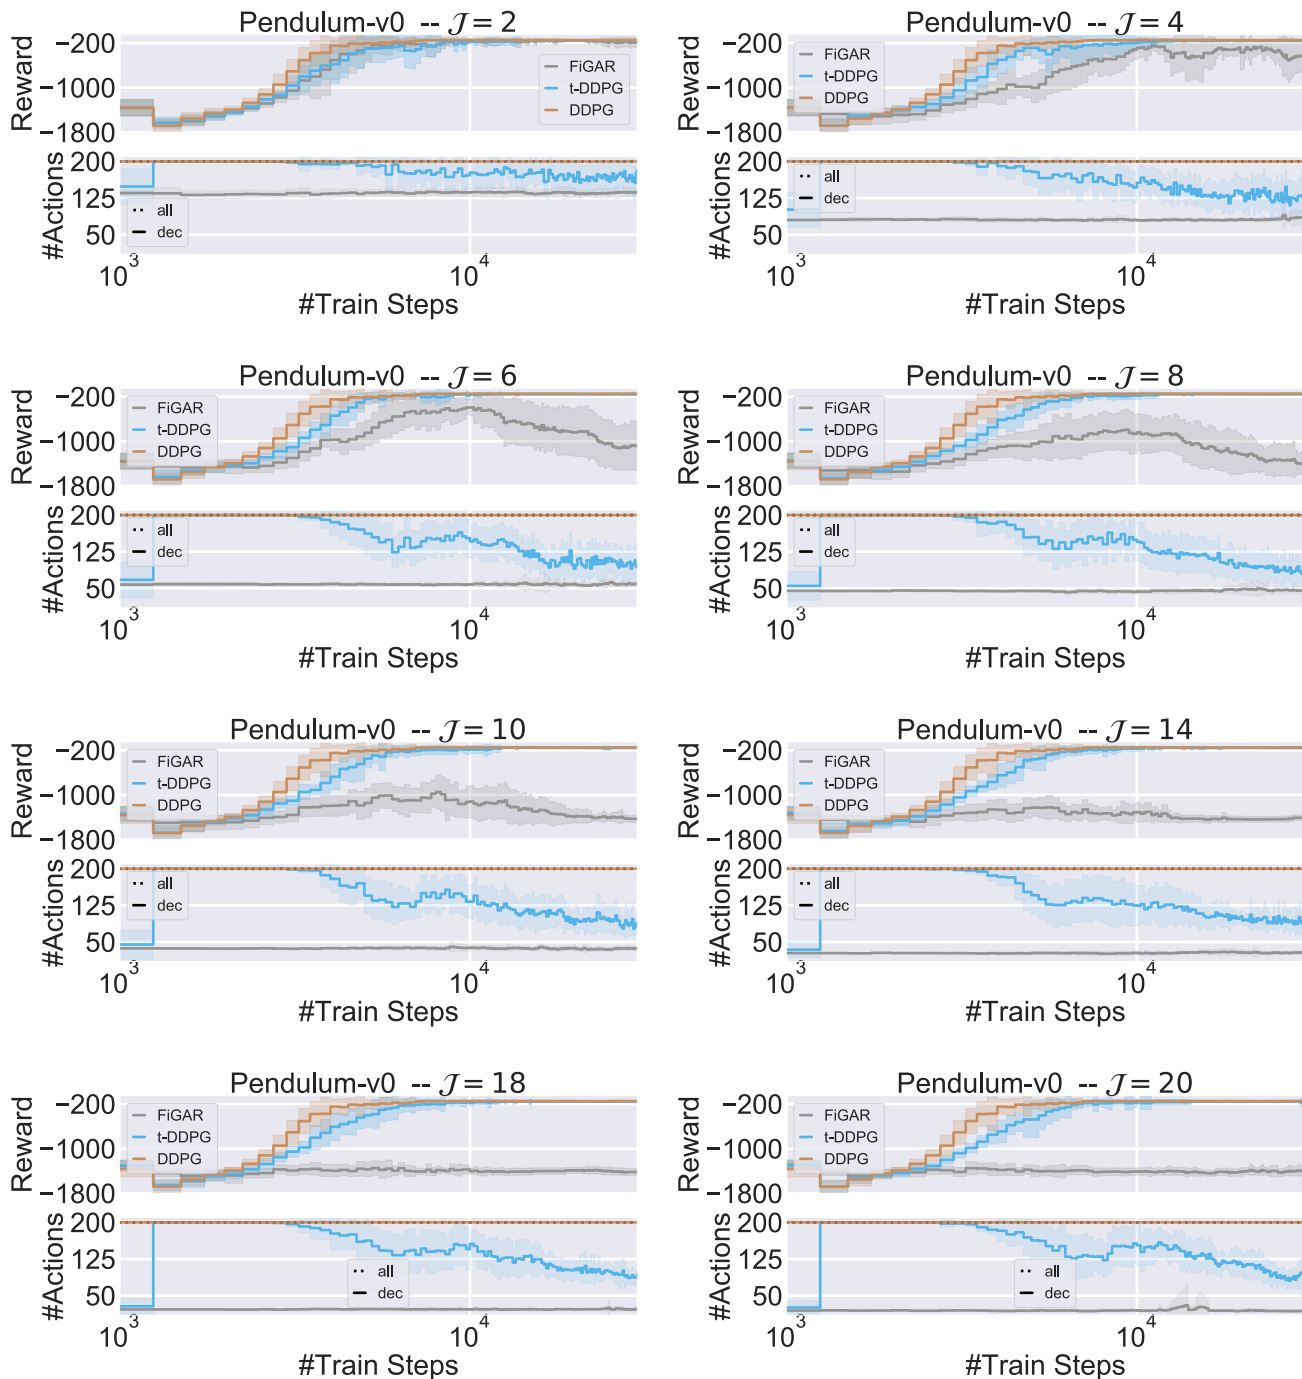

Figure F1. Learning curves of different DDPG agents on Pendulum-v0.  $J$  indicates the maximal skip-length used when training t-DDPG and FIGAR. Solid lines give the mean and the shaded area the standard deviation over 15 seeds. Top-row images show the reward achieved and bottom-row images the required steps and decisions per evaluation rollout.

## F. DDPG Implementation Details and Additional Results

As base implementation for DDPG, we used publicly available code<sup>5</sup> and used the default hyperparameters, except we replaced the number of maximal training steps and initial random steps as described in the main paper. When implementing FiGAR, we followed the description by Sharma et al. (2017). Thus, the repetition policy uses a constant epsilon-greedy exploration. Likewise, we use a constant epsilon-greedy exploration to learn our t-DDPG.

For our t-DDPG implementation we could use the same algorithm as described in Algorithm 1. Only the greyed out parts of normal  $Q$ -learning have to be replaced by DDPG training specific elements. For example, for DDPG, the exploration policy for the actor is given by adding exploration noise rather than following an epsilon-greedy policy. Further, we again can make use of the base agents  $Q$ -function as shown in Equation 6.

Figure F1 depicts the learning curve for all DDPG agents with increasing maximal skip-value. As described in the main paper, both FiGAR and t-DDPG slightly lag behind vanilla DDPG when only allowing for skips of length 2. However, with increasing max-skip value FiGAR quickly begins to struggle and in the end even converges to worse policies, always preferring large skip-values. Our t-DDPG using TEMPORL performs much more stable and is hardly affected by increasing the maximal skip length. Further, t-DDPG over time learns *when* it is necessary to switch to new actions, roughly halving the required decisions.

## G. Featurized Environments Description

**MountainCar** is a challenging exploration task and requires an agent to control an under powered car to drive up a steep hill on one side (Moore, 1990). To reach the goal, an agent has to build up momentum. The agent always receives a reward of  $-1$  until it has crossed the goal position and a reward of  $0$  afterwards. The observation consists of the car position and velocity and the agent can either accelerate to the left or right or do nothing. To build up momentum an agent potentially has to repeat the same action multiple times. Thus, we evaluate both t-DQN and DAR on the grid  $\{2, 4, 6, 8, 10\}$  for the maximal (while keeping the minimal skip value fixed to 1) skip-value over 50 random seeds (see Tables 3a & 4a).

**LunarLander** The task for an agent is to land a space-ship on a lunar surface. To this end, the agent can choose to fire the main engine, steer left or right or do nothing. Firing of the engines incurs a small cost of  $-0.3$ , whereas crashing or successfully landing results in a large cost or reward of  $-100$  and  $100$  respectively. We expect that an environment with such a dense reward, where actions directly influence the achieved reward does not benefit from leveraging skips.

<sup>5</sup><https://github.com/sfujim/TD3>

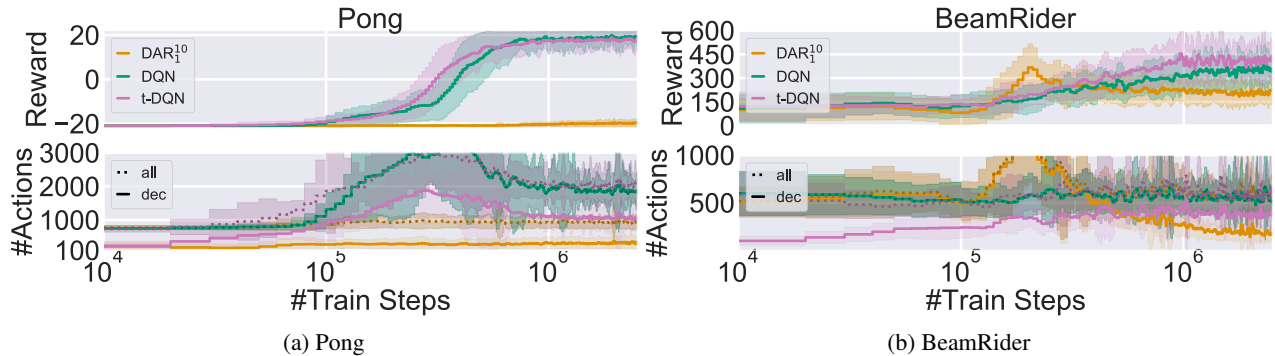

Figure H1. Evaluation performance on Atari environments. Solid lines give the mean and the shaded area the standard deviation over 15 random seeds. (top) Achieved rewards. (bottom) Length of executed policy ( $\cdots$ ) and number of decisions ( $—$ ) made by the policies.

## H. Atari

**Architectures** *DQN*: As architecture for DQN we used that of Mnih et al. (2015) and used this as basis for our shared architecture. This architecture has three layers of convolutions to handle the  $84 \times 84$  input images. The first convolution layer has 84 input channels, 32 output channels, a kernel size of 8 and a stride of 4. The second has 32 input channels, 64 output channels, a kernel size of 4 and a stride of 2. The second has 64 input channels, 64 output channels, a kernel size of 3 and a stride of 1. This is followed by two hidden layers with 512 units each.

*TEMPORL*: The shared architecture used by our *TEMPORL* agent uses the same architecture as just described but has an additional output stream for the skip-outputs. The skip output stream combines a hidden layer with 10 units together with the output of the last convolutional layer. It then processes these features again in two fully connected hidden layers with 512 units each.

*DAR*: Similarly, the *DAR* agent builds on the DQN architecture of Mnih et al. (2015). However, the final output layer is duplicated and the duplicate outputs act at a different time-resolution. To give *DAR* the same coarse control as would be possible with our *TEMPORL* agent we fix the fine and coarse control levels to 1 and 10 respectively.

**Additional Results on PONG:** Our learned t-DQN exhibits a slight improvement in learning speed, PONG before being caught up by DQN (similar to the results on MsPacman in the main paper, see Figure 7a), with both methods converging to the same final reward. Nevertheless, *TEMPORL* learns to make use of different degrees of fine and coarse control to achieve the same performance, requiring roughly 1 000 fewer decisions.

The *DAR* agent really struggles to learn a meaningful policy on this game, never learning to properly avoid getting scored on or scoring itself. A likely reason for the poor performance is the choice of hyperparameters. Potentially choosing smaller skip-value for the coarse control could allow to learn better behaviour with *DAR*.

**Additional Results on BEAMRIDER:** Figure H1b shows an immediate benefit to jointly learning *when* and *how* to act through *TEMPORL*. Our t-DQN begins to learn faster and achieve a better final reward than vanilla DQN.

Interestingly, the *DAR* agent, starting out with choosing to mostly apply fine control starts to learn much faster than vanilla DQN and our *TEMPORL* agent, nearly reaching the final performance of vanilla DQN already  $\approx 900\,000$  time-steps earlier. However, the performance starts to drop when *DAR* starts to increase usage of the coarse control. Once the *DAR* agents have learned this over-reliance on the coarse control, they do not recover, resulting in the worst final performance.

Table H1. Hyperparameters used for the Atari Experiments

| Hyperparameter          | Value           |
|-------------------------|-----------------|
| Batch Size              | 32              |
| $\gamma$                | 0.99            |
| Gradient Clip           | 40.0            |
| Target update frequency | 500             |
| Learning starts         | 10 000          |
| Initial $\epsilon$      | 1.0             |
| Final $\epsilon$        | 0.01            |
| $\epsilon$ time-steps   | 200 000         |
| Train frequency         | 4               |
| Loss Function           | Huber Loss      |
| Optimizer               | Adam            |
| Learning rate           | $10^{-4}$       |
| $\beta_1$               | 0.9             |
| $\beta_2$               | 0.999           |
| Replay-Buffer Size      | $5 \times 10^4$ |
| Skip Replay-Buffer Size | $5 \times 10^4$ |
| $J$                     | 10              |
